# Supplementary material for: First detection and molecular characterization of rabbit hemorrhagic disease virus (RHDV) in Algeria
Source: Frontiers journal article supplement (doi:10.3389/fvets.2023.1235123), 2023-08-31
Supplement: Data_Sheet_1.PDF [file Data_Sheet_1.PDF]

## *Supplementary Material*

### **First detection and molecular characterization of rabbit hemorrhagic disease virus (RHDV) in Algeria**

**Lynda Sahraoui, Hichem Lahouassa, Samia Maziz-Bettahar, Ana M. Lopes, Tereza Almeida, Hacina Ain-Baziz, Joana Abrantes\***

\* **Correspondence:** Joana Abrantes: [jabrantes@cibio.up.pt](mailto:jabrantes@cibio.up.pt)

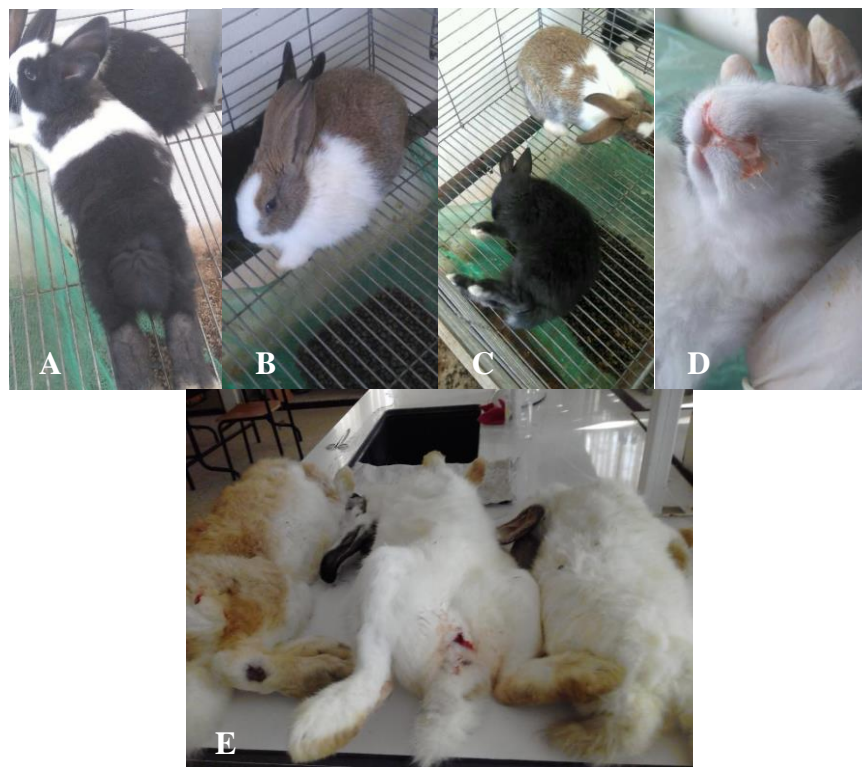

**Supplementary Figure 1.** Clinical signs found in RHD-suspected domestic rabbits. A. Analgesic position of the rabbit due to respiratory difficulties. B. Rabbit with neurological signs before death. C. Prostrated rabbit in the corner of the cage. D. Affected rabbit showing epistaxis. E. Anal bleeding in adult rabbit.

**Supplementary Table 1.** Top 10 strains with highest nucleotide identity with the Algerian strains obtained by nucleotide Blast (nBlast) for the VP60+VP10 sequences.

| Strain     | Top-10 strains (nBlast)                                                 | Query Cover | E value | Identity (%) | Accession  | Country | Date   |
|------------|-------------------------------------------------------------------------|-------------|---------|--------------|------------|---------|--------|
| <b>052</b> | Rabbit hemorrhagic disease virus isolate BC/Canada/WIN-AH-2018-OTH-0024 | 99%         | 0.0     | 97.68%       | MT900570.1 | Canada  | Feb-18 |
|            | Rabbit hemorrhagic disease virus isolate BC/Canada/WIN-AH-2018-OTH-0032 | 99%         | 0.0     | 97.58%       | MT900572.1 | Canada  | Mar-18 |
|            | Rabbit hemorrhagic disease virus isolate BC/Canada/WIN-AH-2018-OTH-0029 | 99%         | 0.0     | 97.58%       | MT900571.1 | Canada  | Feb-18 |
|            | Rabbit hemorrhagic disease virus 2 strain RHDV2/Apr2020/AZ1             | 99%         | 0.0     | 97.54%       | MT506237.2 | Canada  | Feb-18 |
|            | Rabbit hemorrhagic disease virus 2 strain RHDV2/Apr2020/TX1             | 99%         | 0.0     | 97.49%       | MT506233.2 | USA     | Apr-20 |
|            | Rabbit hemorrhagic disease virus strain Senasica_20                     | 99%         | 0.0     | 97.44%       | OM973948.1 | Mexico  | Mar-20 |
|            | Rabbit hemorrhagic disease virus strain MexChihua2020                   | 99%         | 0.0     | 97.44%       | MT982431.1 | Mexico  | Apr-20 |
|            | Rabbit hemorrhagic disease virus 2 isolate S2008982                     | 99%         | 0.0     | 97.39%       | MW926377.1 | USA     | 2020   |
|            | Rabbit hemorrhagic disease virus isolate BC/Canada/WIN-AH-2019-OTH-0022 | 99%         | 0.0     | 97.39%       | MT900573.1 | Canada  | Mar-19 |
|            | Rabbit hemorrhagic disease virus 2 isolate D2014080                     | 99%         | 0.0     | 97.34%       | MW926372.1 | USA     | 2020   |
| <b>068</b> | Rabbit hemorrhagic disease virus isolate BC/Canada/WIN-AH-2018-OTH-0024 | 99%         | 0.0     | 97.54%       | MT900570.1 | Canada  | Feb-18 |
|            | Rabbit hemorrhagic disease virus isolate BC/Canada/WIN-AH-2018-OTH-0032 | 99%         | 0.0     | 97.44%       | MT900572.1 | Canada  | Mar-18 |
|            | Rabbit hemorrhagic disease virus isolate BC/Canada/WIN-AH-2018-OTH-0029 | 99%         | 0.0     | 97.44%       | MT900571.1 | Canada  | Feb-18 |
|            | Rabbit hemorrhagic disease virus 2 strain RHDV2/Apr2020/AZ1             | 99%         | 0.0     | 97.39%       | MT506237.2 | Canada  | Feb-18 |
|            | Rabbit hemorrhagic disease virus 2 strain RHDV2/Apr2020/TX1             | 99%         | 0.0     | 97.34%       | MT506233.2 | USA     | Apr-20 |
|            | Rabbit hemorrhagic disease virus strain Senasica_20                     | 99%         | 0.0     | 97.29%       | OM973948.1 | Mexico  | Mar-20 |
|            | Rabbit hemorrhagic disease virus strain MexChihua2020                   | 99%         | 0.0     | 97.29%       | MT982431.1 | Mexico  | Apr-20 |
|            | Rabbit hemorrhagic disease virus 2 isolate S2008982                     | 99%         | 0.0     | 97.25%       | MW926377.1 | USA     | 2020   |
|            | Rabbit hemorrhagic disease virus isolate BC/Canada/WIN-AH-2019-OTH-0022 | 99%         | 0.0     | 97.25%       | MT900573.1 | Canada  | Mar-19 |
|            | Rabbit hemorrhagic disease virus 2 isolate D2014080                     | 99%         | 0.0     | 97.20%       | MW926372.1 | USA     | 2020   |
| <b>076</b> | Rabbit hemorrhagic disease virus isolate BC/Canada/WIN-AH-2018-OTH-0024 | 99%         | 0.0     | 97.68%       | MT900570.1 | Canada  | Feb-18 |
|            | Rabbit hemorrhagic disease virus isolate BC/Canada/WIN-AH-2018-OTH-0032 | 99%         | 0.0     | 97.58%       | MT900572.1 | Canada  | Mar-18 |
|            | Rabbit hemorrhagic disease virus isolate BC/Canada/WIN-AH-2018-OTH-0029 | 99%         | 0.0     | 97.58%       | MT900571.1 | Canada  | Feb-18 |
|            | Rabbit hemorrhagic disease virus 2 strain RHDV2/Apr2020/AZ1             | 99%         | 0.0     | 97.54%       | MT506237.2 | Canada  | Feb-18 |
|            | Rabbit hemorrhagic disease virus 2 strain RHDV2/Apr2020/TX1             | 99%         | 0.0     | 97.49%       | MT506233.2 | USA     | Apr-20 |
|            | Rabbit hemorrhagic disease virus strain Senasica_20                     | 99%         | 0.0     | 97.44%       | OM973948.1 | Mexico  | Mar-20 |
|            | Rabbit hemorrhagic disease virus strain MexChihua2020                   | 99%         | 0.0     | 97.44%       | MT982431.1 | Mexico  | Apr-20 |
|            | Rabbit hemorrhagic disease virus 2 isolate S2008982                     | 99%         | 0.0     | 97.39%       | MW926377.1 | USA     | 2020   |
|            | Rabbit hemorrhagic disease virus isolate BC/Canada/WIN-AH-2019-OTH-0022 | 99%         | 0.0     | 97.39%       | MT900573.1 | Canada  | Mar-19 |
|            | Rabbit hemorrhagic disease virus 2 isolate S2100208                     | 99%         | 0.0     | 97.29%       | MW926380.1 | USA     | 2021   |
| <b>083</b> | Rabbit hemorrhagic disease virus isolate BC/Canada/WIN-AH-2018-OTH-0032 | 99%         | 0.0     | 97.63%       | MT900572.1 | Canada  | Mar-18 |
|            | Rabbit hemorrhagic disease virus isolate BC/Canada/WIN-AH-2018-OTH-0029 | 99%         | 0.0     | 97.63%       | MT900571.1 | Canada  | Feb-18 |
|            | Rabbit hemorrhagic disease virus isolate BC/Canada/WIN-AH-2018-OTH-0024 | 99%         | 0.0     | 97.63%       | MT900570.1 | Canada  | Feb-18 |
|            | Rabbit hemorrhagic disease virus isolate BC/Canada/WIN-AH-2019-OTH-0022 | 99%         | 0.0     | 97.44%       | MT900573.1 | Canada  | Mar-19 |
|            | Rabbit hemorrhagic disease virus 2 strain RHDV2/Apr2020/AZ1             | 99%         | 0.0     | 97.39%       | MT506237.2 | USA     | Apr-20 |
|            | Rabbit hemorrhagic disease virus 2 strain RHDV2/Apr2020/TX1             | 99%         | 0.0     | 97.34%       | MT506233.2 | USA     | Apr-20 |
|            | Rabbit hemorrhagic disease virus strain Senasica_20                     | 99%         | 0.0     | 97.29%       | OM973948.1 | Mexico  | Mar-20 |
|            | Rabbit hemorrhagic disease virus strain MexChihua2020                   | 99%         | 0.0     | 97.29%       | MT982431.1 | Mexico  | Apr-20 |
|            | Rabbit hemorrhagic disease virus 2 isolate S2008982                     | 99%         | 0.0     | 97.25%       | MW926377.1 | USA     | 2020   |
|            | Rabbit hemorrhagic disease virus 2 isolate S2100208                     | 99%         | 0.0     | 97.15%       | MW926380.1 | USA     | 2021   |
| <b>027</b> | Rabbit hemorrhagic disease virus isolate BC/Canada/WIN-AH-2018-OTH-0024 | 100%        | 0.0     | 97.73%       | MT900570.1 | Canada  | Feb-18 |
|            | Rabbit hemorrhagic disease virus isolate BC/Canada/WIN-AH-2018-OTH-0032 | 100%        | 0.0     | 97.63%       | MT900572.1 | Canada  | Mar-18 |
|            | Rabbit hemorrhagic disease virus isolate BC/Canada/WIN-AH-2018-OTH-0029 | 100%        | 0.0     | 97.63%       | MT900571.1 | Canada  | Feb-18 |

|     |                                                                         |      |     |        |            |         |        |
|-----|-------------------------------------------------------------------------|------|-----|--------|------------|---------|--------|
|     | Rabbit hemorrhagic disease virus 2 strain RHDV2/Apr2020/AZ1             | 100% | 0.0 | 97.59% | MT506237.2 | USA     | Apr-20 |
|     | Rabbit hemorrhagic disease virus 2 strain RHDV2/Apr2020/TX1             | 100% | 0.0 | 97.54% | MT506233.2 | USA     | Apr-20 |
|     | Rabbit hemorrhagic disease virus strain Senasica_20                     | 100% | 0.0 | 97.49% | OM973948.1 | Mexico  | Mar-20 |
|     | Rabbit hemorrhagic disease virus strain MexChihua2020                   | 100% | 0.0 | 97.49% | MT982431.1 | Mexico  | Apr-20 |
|     | Rabbit hemorrhagic disease virus 2 isolate S2100208                     | 100% | 0.0 | 97.34% | MW926380.1 | USA     | 2021   |
|     | Rabbit hemorrhagic disease virus 2 isolate S2008982                     | 100% | 0.0 | 97.34% | MW926377.1 | USA     | 2020   |
|     | Rabbit hemorrhagic disease virus 2 isolate D2100068                     | 100% | 0.0 | 97.34% | MW926374.1 | USA     | 2021   |
| 024 | Rabbit hemorrhagic disease virus isolate BC/Canada/WIN-AH-2018-OTH-0024 | 97%  | 0.0 | 98.25% | MT900570.1 | Canada  | Feb-18 |
|     | Rabbit hemorrhagic disease virus isolate BC/Canada/WIN-AH-2018-OTH-0032 | 97%  | 0.0 | 98.16% | MT900572.1 | Canada  | Mar-18 |
|     | Rabbit hemorrhagic disease virus isolate BC/Canada/WIN-AH-2018-OTH-0029 | 97%  | 0.0 | 98.16% | MT900571.1 | Canada  | Feb-18 |
|     | Rabbit hemorrhagic disease virus 2 strain RHDV2/Apr2020/AZ1             | 97%  | 0.0 | 97.98% | MT506237.2 | USA     | Apr-20 |
|     | Rabbit hemorrhagic disease virus 2 strain RHDV2/Apr2020/TX1             | 97%  | 0.0 | 97.89% | MT506233.2 | USA     | Apr-20 |
|     | Rabbit hemorrhagic disease virus isolate BC/Canada/WIN-AH-2019-OTH-0022 | 97%  | 0.0 | 97.89% | MT900573.1 | Canada  | Mar-19 |
|     | Rabbit hemorrhagic disease virus strain Senasica_20                     | 97%  | 0.0 | 97.81% | OM973948.1 | Mexico  | Mar-20 |
|     | Rabbit hemorrhagic disease virus strain MexChihua2020                   | 97%  | 0.0 | 97.81% | MT982431.1 | Mexico  | Apr-20 |
|     | Rabbit hemorrhagic disease virus 2 isolate S2008982                     | 97%  | 0.0 | 97.72% | MW926377.1 | USA     | 2020   |
|     | Rabbit hemorrhagic disease virus 2 isolate D2100068                     | 97%  | 0.0 | 97.72% | MW926374.1 | USA     | 2021   |
| 002 | Rabbit hemorrhagic disease virus isolate Zar06-12                       | 96%  | 0.0 | 97.63% | KP129399.1 | Spain   | 2012   |
|     | Rabbit hemorrhagic disease virus isolate Jedaïda_2/TUN/2019             | 96%  | 0.0 | 97.50% | MZ913391.1 | Tunisia | 2019   |
|     | Rabbit hemorrhagic disease virus isolate Jedaïda_1/TUN/2019             | 96%  | 0.0 | 97.50% | MZ913390.1 | Tunisia | 2019   |
|     | Rabbit hemorrhagic disease virus isolate Touza_2/TUN/2019               | 96%  | 0.0 | 97.31% | MZ913395.1 | Tunisia | 2019   |
|     | Rabbit hemorrhagic disease virus isolate Touza_1/TUN/2019               | 96%  | 0.0 | 97.31% | MZ913394.1 | Tunisia | 2019   |
|     | Rabbit hemorrhagic disease virus isolate Rabbit_1512/TUN/2020           | 96%  | 0.0 | 97.31% | MZ913393.1 | Tunisia | 2020   |
|     | Rabbit hemorrhagic disease virus isolate Monastir_1/TUN/2018            | 96%  | 0.0 | 96.99% | MZ913392.1 | Tunisia | 2018   |
|     | Rabbit hemorrhagic disease virus strain RHDV/GER-BY/D35.L00714/2014     | 96%  | 0.0 | 96.73% | LR899192.1 | Germany | 2014   |
|     | Rabbit hemorrhagic disease virus isolate RHDV-N11                       | 96%  | 0.0 | 96.60% | KM878681.1 | Spain   | 2011   |
|     | Rabbit hemorrhagic disease virus isolate Tar06-12                       | 96%  | 0.0 | 96.48% | KP129397.1 | Spain   | 2012   |

**Supplementary Table 2.** Top 10 strains with highest nucleotide identity with the Algerian strains obtained by nucleotide Blast (nBlast) for the partial RdRp sequences.

| Strain     | Top-10 strains (nBlast)                                     | Query Cover | E value | Identity (%) | Accession  | Country | Date   |
|------------|-------------------------------------------------------------|-------------|---------|--------------|------------|---------|--------|
| <b>052</b> | Rabbit hemorrhagic disease virus 2 strain RHDV2/Apr2020/AZ1 | 100%        | 0.0     | 98.67%       | MT506237.2 | USA     | Apr-20 |
|            | Rabbit hemorrhagic disease virus 2 strain RHDV2/Mar2020/NM1 | 100%        | 0.0     | 98.67%       | MT506234.2 | USA     | Mar-20 |
|            | Rabbit hemorrhagic disease virus 2 strain RHDV2/Apr2020/TX1 | 100%        | 0.0     | 98.67%       | MT506233.2 | USA     | Apr-20 |
|            | Rabbit hemorrhagic disease virus strain Senasica_20         | 100%        | 0.0     | 98.52%       | OM973948.1 | Mexico  | Mar-20 |
|            | Rabbit hemorrhagic disease virus strain MexChihua2020       | 100%        | 0.0     | 98.52%       | MT982431.1 | Mexico  | Apr-20 |
|            | Rabbit hemorrhagic disease virus 2 isolate S2101296         | 100%        | 0.0     | 98.52%       | MW926381.1 | USA     | 2021   |
|            | Rabbit hemorrhagic disease virus 2 isolate S2006894         | 100%        | 0.0     | 98.52%       | MW926375.1 | USA     | 2020   |
|            | Rabbit hemorrhagic disease virus 2 isolate D2100068         | 100%        | 0.0     | 98.52%       | MW926374.1 | USA     | 2021   |
|            | Rabbit hemorrhagic disease virus 2 isolate S2101766         | 100%        | 0.0     | 98.38%       | MW926384.1 | USA     | 2021   |
|            | Rabbit hemorrhagic disease virus 2 isolate T2002842         | 100%        | 0.0     | 98.38%       | MW926383.1 | USA     | 2020   |
| <b>068</b> | Rabbit hemorrhagic disease virus 2 strain RHDV2/Apr2020/AZ1 | 100%        | 0.0     | 98.67%       | MT506237.2 | USA     | Apr-20 |
|            | Rabbit hemorrhagic disease virus 2 strain RHDV2/Mar2020/NM1 | 100%        | 0.0     | 98.67%       | MT506234.2 | USA     | Mar-20 |
|            | Rabbit hemorrhagic disease virus 2 strain RHDV2/Apr2020/TX1 | 100%        | 0.0     | 98.67%       | MT506233.2 | USA     | Apr-20 |
|            | Rabbit hemorrhagic disease virus strain Senasica_20         | 100%        | 0.0     | 98.52%       | OM973948.1 | Mexico  | Mar-20 |
|            | Rabbit hemorrhagic disease virus strain MexChihua2020       | 100%        | 0.0     | 98.52%       | MT982431.1 | Mexico  | Apr-20 |
|            | Rabbit hemorrhagic disease virus 2 isolate S2101296         | 100%        | 0.0     | 98.52%       | MW926381.1 | USA     | 2021   |
|            | Rabbit hemorrhagic disease virus 2 isolate S2006894         | 100%        | 0.0     | 98.52%       | MW926375.1 | USA     | 2020   |
|            | Rabbit hemorrhagic disease virus 2 isolate D2100068         | 100%        | 0.0     | 98.52%       | MW926374.1 | USA     | 2021   |
|            | Rabbit hemorrhagic disease virus 2 isolate S2101766         | 100%        | 0.0     | 98.38%       | MW926384.1 | USA     | 2021   |
|            | Rabbit hemorrhagic disease virus 2 isolate T2002842         | 100%        | 0.0     | 98.38%       | MW926383.1 | USA     | 2020   |
| <b>076</b> | Rabbit hemorrhagic disease virus 2 strain RHDV2/Apr2020/AZ1 | 100%        | 0.0     | 98.67%       | MT506237.2 | USA     | Apr-20 |
|            | Rabbit hemorrhagic disease virus 2 strain RHDV2/Mar2020/NM1 | 100%        | 0.0     | 98.67%       | MT506234.2 | USA     | Mar-20 |
|            | Rabbit hemorrhagic disease virus 2 strain RHDV2/Apr2020/TX1 | 100%        | 0.0     | 98.67%       | MT506233.2 | USA     | Apr-20 |
|            | Rabbit hemorrhagic disease virus strain Senasica_20         | 100%        | 0.0     | 98.52%       | OM973948.1 | Mexico  | Mar-20 |
|            | Rabbit hemorrhagic disease virus strain MexChihua2020       | 100%        | 0.0     | 98.52%       | MT982431.1 | Mexico  | Apr-20 |
|            | Rabbit hemorrhagic disease virus 2 isolate S2101296         | 100%        | 0.0     | 98.52%       | MW926381.1 | USA     | 2021   |
|            | Rabbit hemorrhagic disease virus 2 isolate S2006894         | 100%        | 0.0     | 98.52%       | MW926375.1 | USA     | 2020   |
|            | Rabbit hemorrhagic disease virus 2 isolate D2100068         | 100%        | 0.0     | 98.52%       | MW926374.1 | USA     | 2021   |
|            | Rabbit hemorrhagic disease virus 2 isolate S2101766         | 100%        | 0.0     | 98.38%       | MW926384.1 | USA     | 2021   |
|            | Rabbit hemorrhagic disease virus 2 isolate T2002842         | 100%        | 0.0     | 98.38%       | MW926383.1 | USA     | 2020   |
| <b>083</b> | Rabbit hemorrhagic disease virus 2 strain RHDV2/Apr2020/AZ1 | 100%        | 0.0     | 98.38%       | MT506237.2 | USA     | Apr-20 |
|            | Rabbit hemorrhagic disease virus 2 strain RHDV2/Mar2020/NM1 | 100%        | 0.0     | 98.38%       | MT506234.2 | USA     | Mar-20 |
|            | Rabbit hemorrhagic disease virus 2 strain RHDV2/Apr2020/TX1 | 100%        | 0.0     | 98.38%       | MT506233.2 | USA     | Apr-20 |
|            | Rabbit hemorrhagic disease virus strain Senasica_20         | 100%        | 0.0     | 98.23%       | OM973948.1 | Mexico  | Mar-20 |
|            | Rabbit hemorrhagic disease virus strain MexChihua2020       | 100%        | 0.0     | 98.23%       | MT982431.1 | Mexico  | Apr-20 |
|            | Rabbit hemorrhagic disease virus 2 isolate S2101296         | 100%        | 0.0     | 98.23%       | MW926381.1 | USA     | 2021   |
|            | Rabbit hemorrhagic disease virus 2 isolate S2006894         | 100%        | 0.0     | 98.23%       | MW926375.1 | USA     | 2020   |
|            | Rabbit hemorrhagic disease virus 2 isolate D2100068         | 100%        | 0.0     | 98.23%       | MW926374.1 | USA     | 2021   |
|            | Rabbit hemorrhagic disease virus 2 isolate S2101766         | 100%        | 0.0     | 98.08%       | MW926384.1 | USA     | 2021   |
|            | Rabbit hemorrhagic disease virus 2 isolate T2002842         | 100%        | 0.0     | 98.08%       | MW926383.1 | USA     | 2020   |
| <b>027</b> | Rabbit hemorrhagic disease virus 2 strain RHDV2/Apr2020/AZ1 | 100%        | 0.0     | 98.08%       | MT506237.2 | USA     | Apr-20 |
|            | Rabbit hemorrhagic disease virus 2 strain RHDV2/Mar2020/NM1 | 100%        | 0.0     | 98.08%       | MT506234.2 | USA     | Mar-20 |
|            | Rabbit hemorrhagic disease virus 2 strain RHDV2/Apr2020/TX1 | 100%        | 0.0     | 98.08%       | MT506233.2 | USA     | Apr-20 |

|     |                                                                         |      |     |        |            |          |        |
|-----|-------------------------------------------------------------------------|------|-----|--------|------------|----------|--------|
|     | Rabbit hemorrhagic disease virus isolate BC/Canada/WIN-AH-2019-OTH-0022 | 100% | 0.0 | 98.08% | MT900573.1 | Canada   | Mar-19 |
|     | Rabbit hemorrhagic disease virus isolate BC/Canada/WIN-AH-2018-OTH-0032 | 100% | 0.0 | 98.08% | MT900572.1 | Canada   | Mar-18 |
|     | Rabbit hemorrhagic disease virus isolate BC/Canada/WIN-AH-2018-OTH-0029 | 100% | 0.0 | 98.08% | MT900571.1 | Canada   | Feb-18 |
|     | Rabbit hemorrhagic disease virus isolate BC/Canada/WIN-AH-2018-OTH-0024 | 100% | 0.0 | 98.08% | MT900570.1 | Canada   | Feb-18 |
|     | Rabbit hemorrhagic disease virus strain Senasica_20                     | 100% | 0.0 | 97.93% | OM973948.1 | Mexico   | Mar-20 |
|     | Rabbit hemorrhagic disease virus strain MexChihua2020                   | 100% | 0.0 | 97.93% | MT982431.1 | Mexico   | Apr-20 |
|     | Rabbit hemorrhagic disease virus 2 isolate S2101296                     | 100% | 0.0 | 97.93% | MW926381.1 | USA      | 2021   |
| 024 | Rabbit hemorrhagic disease virus 2 strain RHDV2/Apr2020/AZ1             | 100% | 0.0 | 98.38% | MT506237.2 | USA      | Apr-20 |
|     | Rabbit hemorrhagic disease virus 2 strain RHDV2/Mar2020/NM1             | 100% | 0.0 | 98.38% | MT506234.2 | USA      | Mar-20 |
|     | Rabbit hemorrhagic disease virus 2 strain RHDV2/Apr2020/TX1             | 100% | 0.0 | 98.38% | MT506233.2 | USA      | Apr-20 |
|     | Rabbit hemorrhagic disease virus strain Senasica_20                     | 100% | 0.0 | 98.23% | OM973948.1 | Mexico   | Apr-20 |
|     | Rabbit hemorrhagic disease virus strain MexChihua2020                   | 100% | 0.0 | 98.23% | MT982431.1 | Mexico   | Apr-20 |
|     | Rabbit hemorrhagic disease virus 2 isolate S2101296                     | 100% | 0.0 | 98.23% | MW926381.1 | USA      | 2021   |
|     | Rabbit hemorrhagic disease virus 2 isolate S2006894                     | 100% | 0.0 | 98.23% | MW926375.1 | USA      | 2020   |
|     | Rabbit hemorrhagic disease virus 2 isolate D2100068                     | 100% | 0.0 | 98.23% | MW926374.1 | USA      | 2021   |
|     | Rabbit hemorrhagic disease virus 2 isolate S2101766                     | 100% | 0.0 | 98.08% | MW926384.1 | USA      | 2021   |
|     | Rabbit hemorrhagic disease virus 2 isolate T2002842                     | 100% | 0.0 | 98.08% | MW926383.1 | USA      | 2020   |
| 002 | Rabbit hemorrhagic disease virus isolate Zar06-12                       | 63%  | 0.0 | 98.38% | KP129399.1 | Spain    | 2012   |
|     | Rabbit hemorrhagic disease virus isolate Tar06-12                       | 63%  | 0.0 | 98.15% | KP129397.1 | Spain    | 2012   |
|     | Rabbit hemorrhagic disease virus strain RHDV/GER-NW/EI15-7.L03600/2016  | 63%  | 0.0 | 97.92% | LR899170.1 | Germany  | 2016   |
|     | Rabbit hemorrhagic disease virus strain RHDV/GER-BY/D35.L00714/2014     | 63%  | 0.0 | 97.92% | LR899192.1 | Germany  | 2014   |
|     | Rabbit hemorrhagic disease virus isolate Seg08-12                       | 63%  | 0.0 | 97.69% | KP129396.1 | Spain    | 2012   |
|     | Rabbit hemorrhagic disease virus isolate RHDV-N11                       | 63%  | 0.0 | 97.69% | KM878681.1 | Spain    | 2011   |
|     | Rabbit hemorrhagic disease virus isolate Rabbit_1512/TUN/2020           | 63%  | 0.0 | 97.46% | MZ913393.1 | Tunisia  | 2020   |
|     | Rabbit hemorrhagic disease virus isolate Jedaïda_2/TUN/2019             | 63%  | 0.0 | 97.46% | MZ913391.1 | Tunisia  | 2019   |
|     | Rabbit hemorrhagic disease virus isolate Jedaïda_1/TUN/2019             | 63%  | 0.0 | 97.46% | MZ913390.1 | Tunisia  | 2019   |
|     | Rabbit hemorrhagic disease virus isolate CBVal16                        | 63%  | 0.0 | 97.23% | KM979445.1 | Portugal | 2016   |
